# Supplementary material for: Transfer Effects of a Multiple-Joint Isokinetic Eccentric Resistance Training Intervention to Nontraining-Specific Traditional Muscle Strength Measures
Source: MDPI journal article supplement (doi:10.3390/sports11010009), 2023-01-04
Supplement: s1 [file s1]

**Supplement Table S1.** Mean (SD), change scores, *p*-values, and Cohen's *d* effect size values for muscle function variables before (Pre) and after (Post) the training period for male participants.

| Action                  | Variable       | Pre                 | Post                | Change score (%) | Cohen's <i>d</i> |
|-------------------------|----------------|---------------------|---------------------|------------------|------------------|
| Eccentron               | Peak Force (N) | 1791.91<br>(544.12) | 2213.31<br>(484.56) | 28.24            | 1.12             |
| Leg Press               | 1 RM (N)       | 2491.00<br>(383.51) | 2904.05<br>(424.89) | 16.58            | 1.02             |
| Knee Extensors (Biodex) | IsomPT (Nm)    | 190.80<br>(38.87)   | 202.58<br>(26.06)   | 6.17             | 0.36             |
|                         | Ecc30 (Nm)     | 240.22<br>(44.67)   | 247.65<br>(37.66)   | 3.09             | 0.18             |
|                         | Con150 (Nm)    | 157.74<br>(27.04)   | 158.37<br>(23.94)   | 0.40             | 0.02             |

Note: Cohen's *d* values compare within-group pretest and posttest differences and are identified as being small, moderate, and large on the basis of values of 0.2, 0.5, or 0.8 respectively. Ecc30 = Biodex knee extensor eccentric muscle action at 30°·sec<sup>-1</sup>; Eccentron = maximal multiple-joint eccentric force on the Eccentron device; IsomPT = isometric PT of the knee extensors on the Biodex; Con150, Biodex knee extensor concentric muscle action at 150°·sec<sup>-1</sup>.

**Supplement Table S2.** Mean (SD), change scores, *p*-values, and Cohen's *d* effect size values for muscle function variables before (Pre) and after (Post) the training period for female participants

| Action                  | Variable       | Pre                 | Post                | Change score (%) | Cohen's <i>d</i> |
|-------------------------|----------------|---------------------|---------------------|------------------|------------------|
| Eccentron               | Peak Force (N) | 943.02<br>(332.37)  | 1496.09<br>(501.53) | 58.65            | 1.33             |
| Leg Press               | 1 RM (N)       | 1230.67<br>(276.60) | 1534.64<br>(272.40) | 24.70            | 1.11             |
| Knee Extensors (Biodex) | IsomPT (Nm)    | 148.31<br>(36.26)   | 158.35<br>(25.26)   | 6.77             | 0.33             |
|                         | Ecc30 (Nm)     | 189.14<br>(67.29)   | 203.22<br>(41.59)   | 7.45             | 0.26             |
|                         | Con150 (Nm)    | 94.32<br>(22.48)    | 97.08<br>(17.00)    | 2.92             | 0.14             |

Note: Cohen's *d* values compare within-group pretest and posttest differences and are identified as being small, moderate, and large on the basis of values of 0.2, 0.5, or 0.8 respectively. Ecc30 = Biodex knee extensor eccentric muscle action at 30°·sec<sup>-1</sup>; Eccentron = maximal multiple-joint eccentric force on the Eccentron device; IsomPT = isometric PT of the knee extensors on the Biodex; Con150, Biodex knee extensor concentric muscle action at 150°·sec<sup>-1</sup>.
